# Supplementary material for: Structure, Gene Flow, and Recombination among Geographic Populations of a Russula virescens Ally from Southwestern China
Source: PubMed Central journal article supplement (PMC3775738; doi:10.1371/journal.pone.0073174), 2013-09-17

Fig. S5

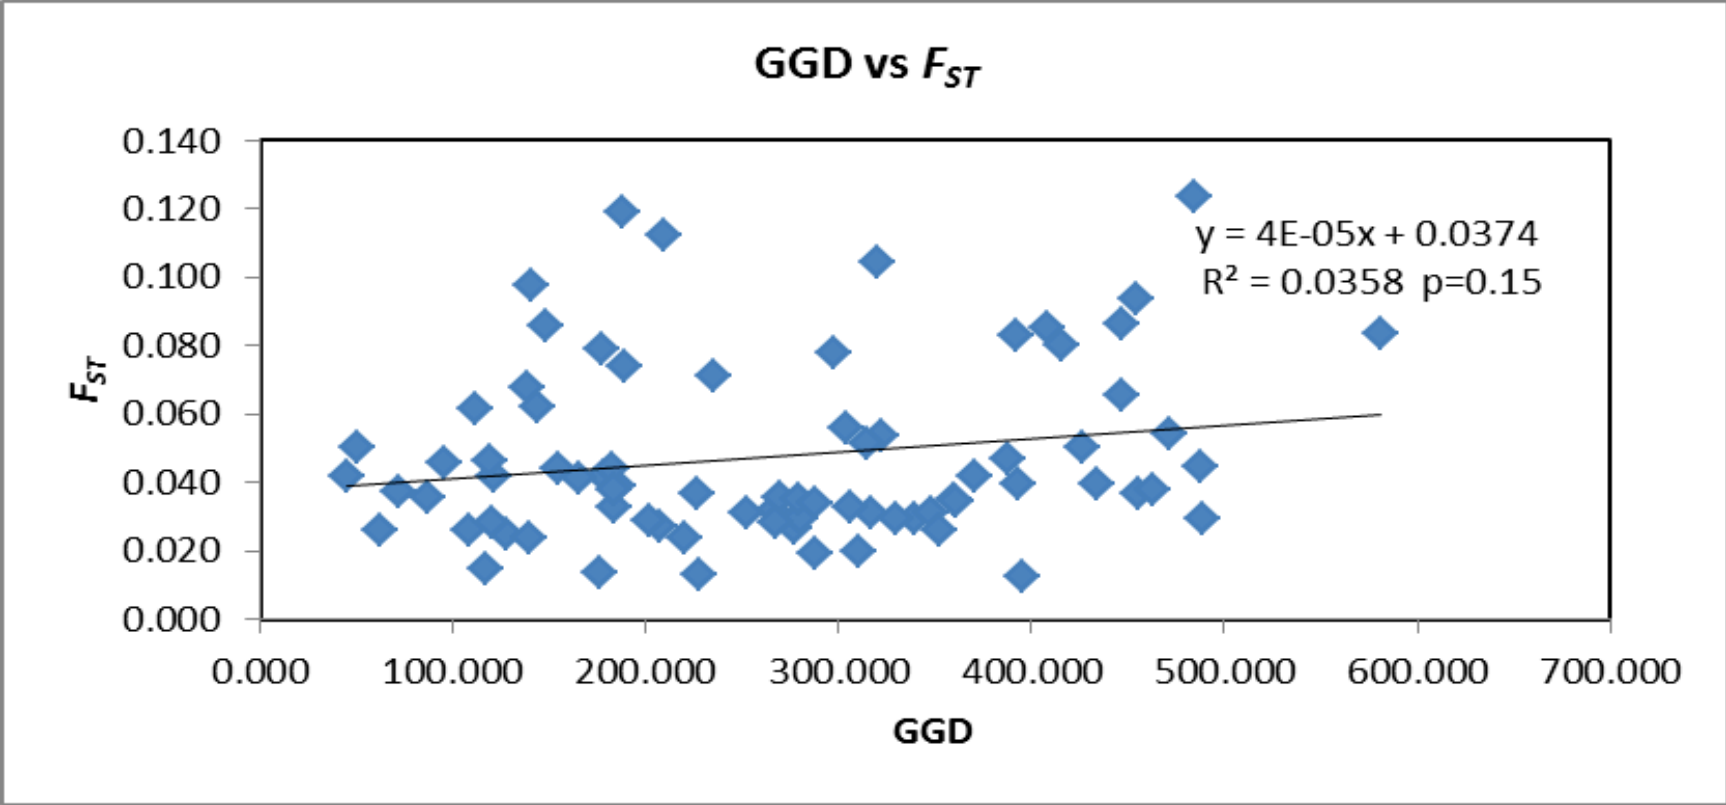

Supplement: pone.0073174.s005.pdf [file pone.0073174.s005.pdf]
